# Supplementary material
Source: PubMed Central journal article supplement (PMC2944069)
Supplement: emboj2010198s1.pdf [file emboj2010198s1.pdf]

## Supplementary Information

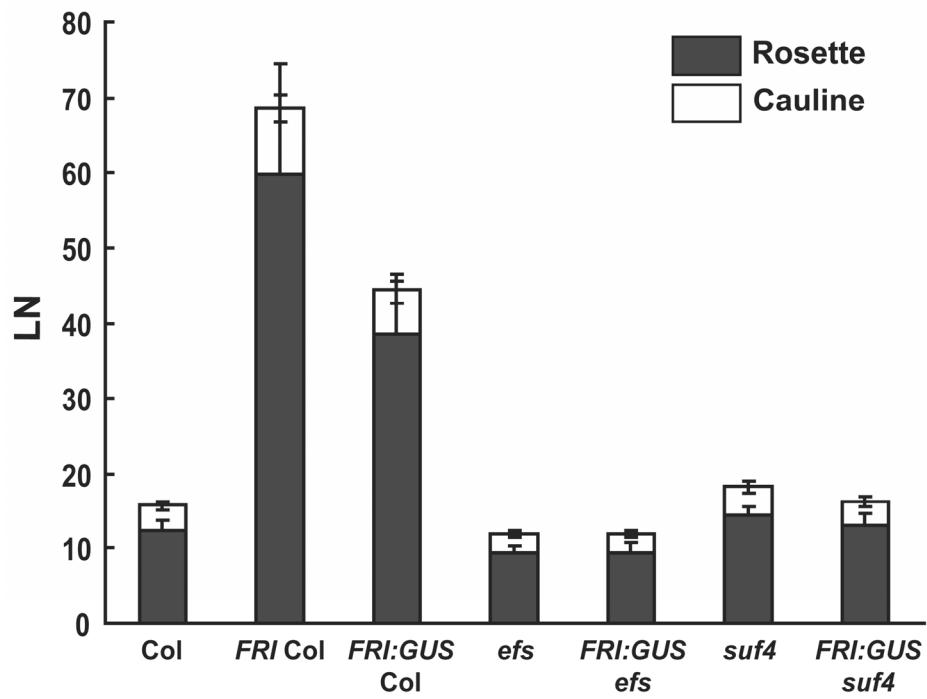

**Supplementary Figure S1** Flowering time of transgenic plants homozygous for *FRI:GUS* in LD. *FRI:GUS* was first transformed into Col and introduced into *efs* and *suf4* backgrounds by crossing. Flowering time was determined by the leaf number (LN). Error bars represent sd.

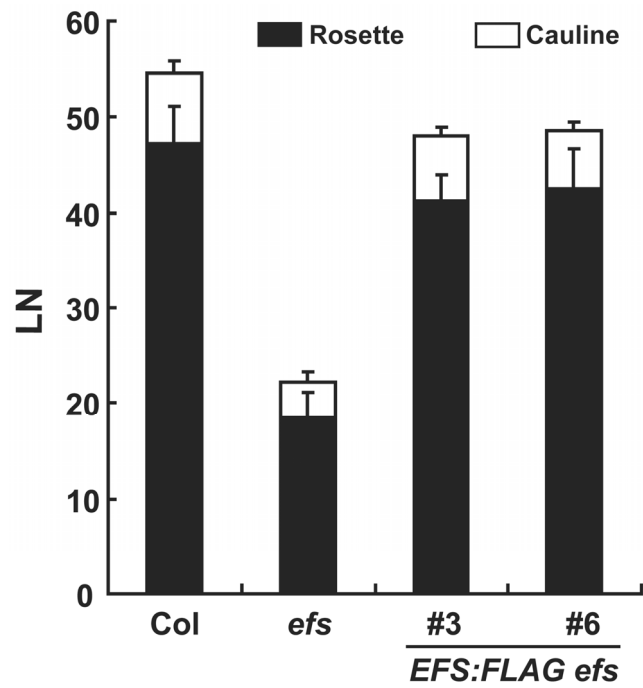

**Supplementary Figure S2** Flowering time of transgenic *efs* plants harboring *EFS:FLAG* in SD. Number 3 and number 6 are representative transgenic lines homozygous for *EFS:FLAG*. LN: leaf number. Error bars represent sd.

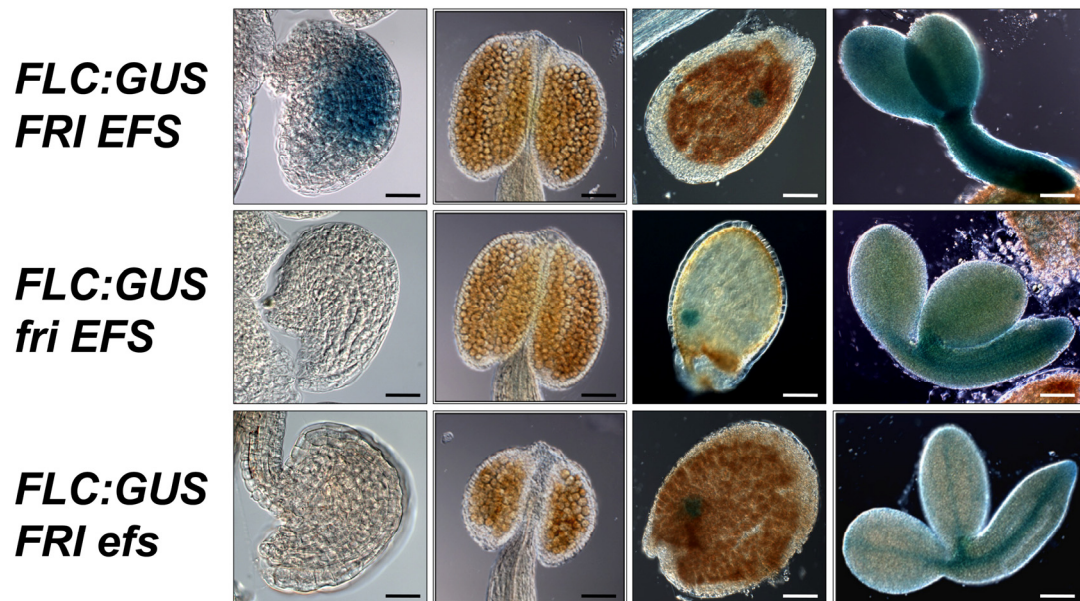

**Supplementary Figure S3** *FLC:GUS* expression in gametophytes and embryos of *fri* or *efs* mutants. Left to right: ovules, stamen, seeds with heart-stage embryos, mature embryos. GUS expression in the ovule of the *FRI EFS* plant was derived from diploid maternal tissues and not from gametophytic embryo sacs (Choi *et al*, 2009). Scale bars: 100  $\mu\text{m}$  except for ovules (20  $\mu\text{m}$ ).

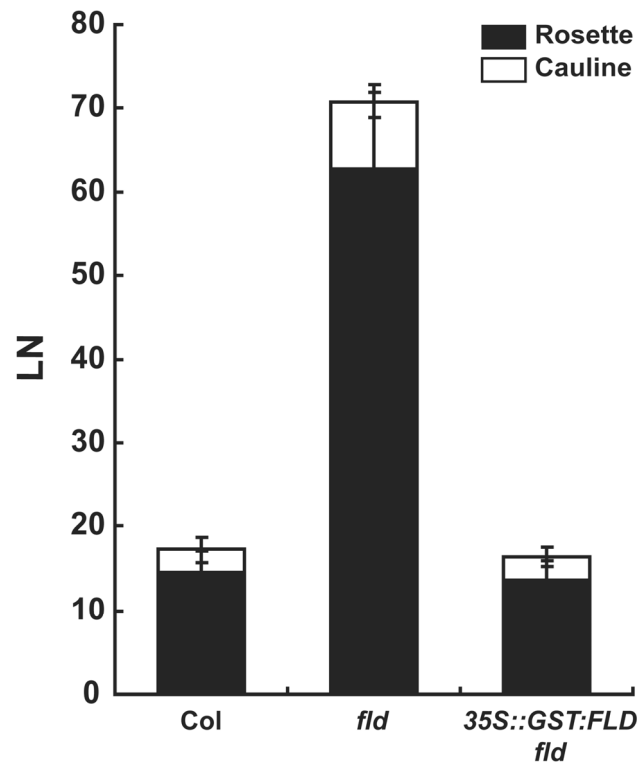

**Supplementary Figure S4** Flowering time of transgenic *fld* plants harboring *35S::GST:FLD* in LD. LN: leaf number. Error bars represent sd.
